# Supplementary material for: The Biologic IRL201805 Alters Immune Tolerance Leading to Prolonged Pharmacodynamics and Efficacy in Rheumatoid Arthritis Patients
Source: MDPI journal article supplement (doi:10.3390/ijms25084394), 2024-04-16
Supplement: s1 [file s1]

Supplementary Data.

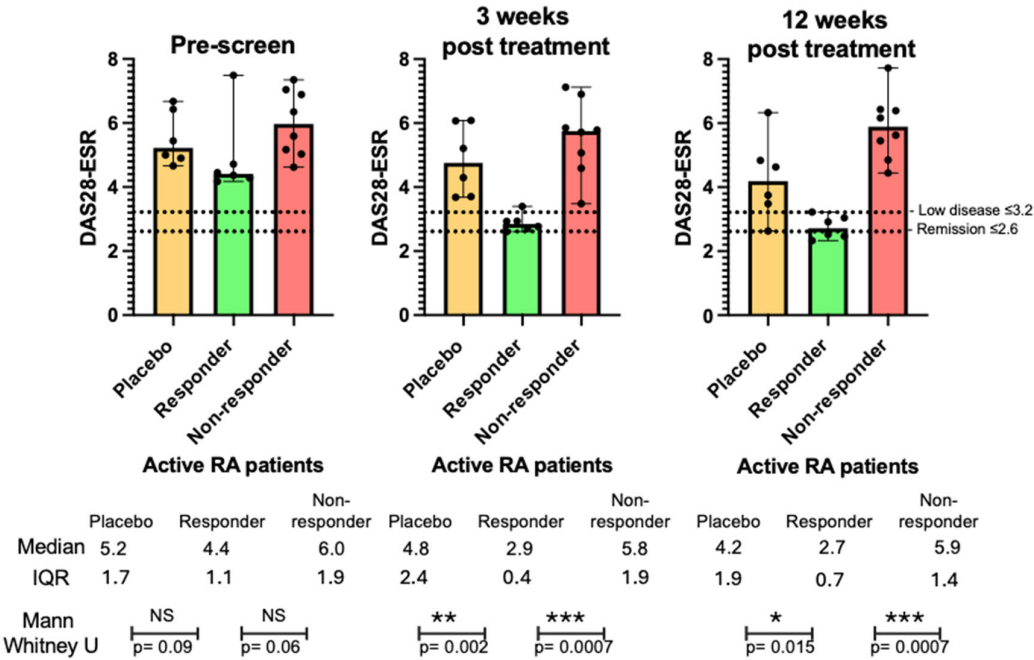

**Supplementary Figure S1.** In the trial we used the DAS28 calculated with erythrocyte sedimentation rate (ESR) to assess disease activity. There was no statistically significant difference between randomised groups in the median DAS28.ESR  $\pm$  IQR at the beginning of the trial. After three weeks onwards the IRL201805Res patients had a significantly lower DAS28 score compared to placebo and IRL201805NRes patients. At week 12 all responders ( $n=6$ ) had achieved and retained a DAS28 score of between 3.2 and 2.6, defined as have low disease activity or remission respectively. In contrast, one placebo RA patient attained remission and no non-responders achieved low disease or remission status.

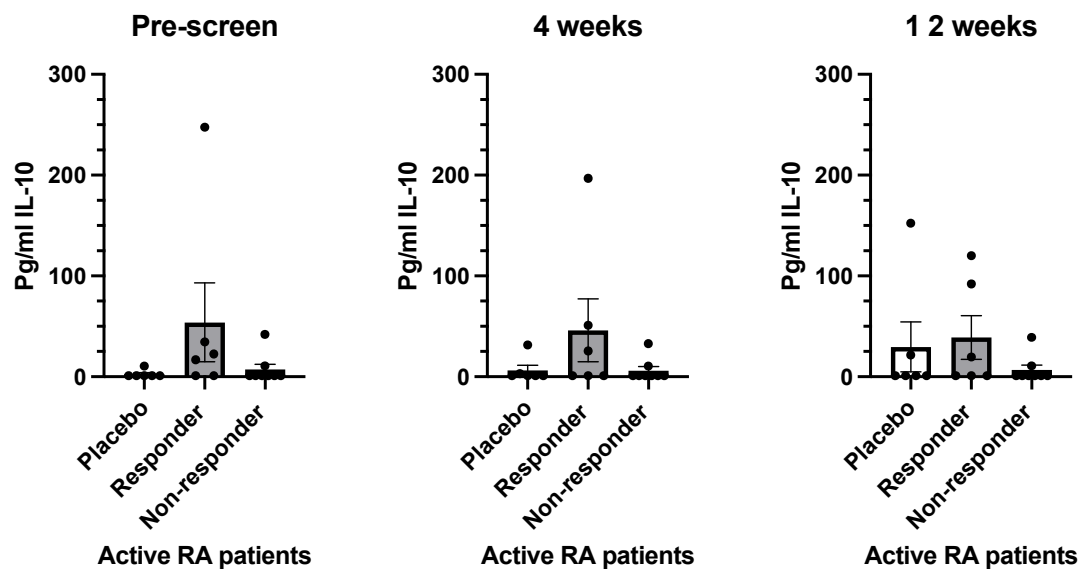

**Supplementary Figure S2.** IL-10 measurements in serum in RA patients at pre-screen, 4 weeks and 12 weeks after a single dose of either 1, 5 or 15 mg IRL201805 administered intravenously. Mean value  $\pm$  SEM are reported.

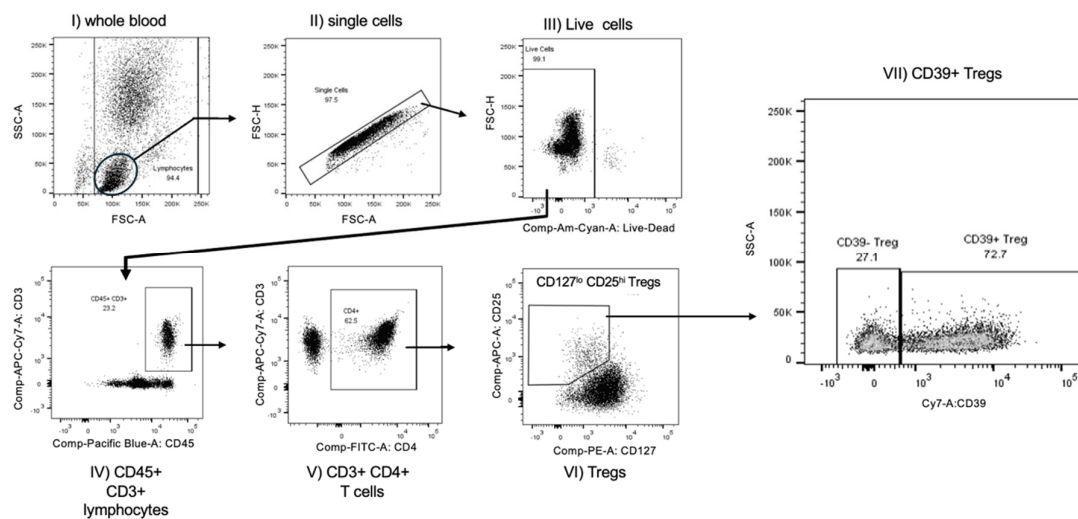

**Supplementary Figure S3.** Flow cytometry gating strategy for analysis of CD39+ Treg subsets. I) WBCs from whole blood were gated as, II) single cells and then III) viable cells were selected, IV) CD45+ lymphocytes were gated on CD45 and CD3. V) CD4+ lymphocytes were confirmed at the CD3+/CD4+ gate. VI) Tregs defined as CD25<sup>hi</sup>CD127<sup>lo</sup> were gated from the main population of T cells. VII) CD39+ cells were observed as a defined population at the SSC-A and CD39+ gate and compared between treatments.

**Supplementary Table S1. Antibody panels used for flow cytometry staining**

| <b>Panel 1</b> | <b>CD4/Treg</b> |         |              |            |
|----------------|-----------------|---------|--------------|------------|
| Colour         | Isotype         | Antigen | *Cat. Number | clone      |
| Pacific Blue   | IgG1k           | CD45    | 304021       | HI30       |
| APC Cy7        | IgG1k           | CD3     | 344817       | SK7        |
| FITC           | IgG2bk          | CD4     | 317407       | OKT4       |
| APC            | IgG1k           | CD25    | 302609       | BC96       |
| PE Cy7         | IgG1k           | CD39    | 328211       | A1         |
| PE             | IgG1k           | CD127   | 557938       | hIL-7R-M21 |
| <b>Panel 2</b> | <b>CD8</b>      |         |              |            |
| Pacific Blue   | IgG1k           | CD45    | 304021       | HI30       |
| APC Cy7        | IgG1k           | CD3     | 344817       | SK7        |
| FITC           | IgG1k           | CD8     | 344703       | SK1        |
| PE Cy7         | IgG1k           | CD28    | 302925       | CD28.2     |
| APC            | IgG1k           | CD56    | 318309       | HCD56      |
| PE             | IgG1k           | CD183   | 353705       | G025H7     |
| PerCP 5.5      | IgG1k           | CD62L   | 304823       | DREG-56    |
| <b>Panel 3</b> | <b>Monocyte</b> |         |              |            |
| Pacific Blue   | IgG1k           | CD45    | 304021       | HI30       |
| PerCP 5.5      | IgG1k           | CD14    | 325621       | HCD14      |
| FITC           | IgG2bk          | CD20    | 302303       | 2H7        |
| APC            | IgG2bk          | CD86    | 305411       | IT2.2      |
| PE Cy7         | IgG2ak          | HLA-DR  | 307615       | L243       |
| PE             | IgG1k           | CD80    | 305207       | 2D10       |

\*All the panels: the antibodies were from Biolegend® except CD127 which is from BD Biosciences

Compensation of fluorochromes was performed using BD FACSDiva™ software on a BD FACSCanto™ which collected data from each compensation control tube and automatically calculates accurate compensation values for each fluorochrome combination. A typical compensation matrix for the Treg panel is shown below:

| Show All       | FITC-A | PE-A    | PerCP-Cy5-5-A | PE-Cy7-A | APC-A  | APC-Cy7-A | Pacific Blue-A | AmCyan-A |
|----------------|--------|---------|---------------|----------|--------|-----------|----------------|----------|
| FITC-A         | 100    | 12.9232 | 3.1214        | 0.2552   | 0.2602 | 0.0773    | 0.4395         | 3.7702   |
| PE-A           | 1.3602 | 100     | 17.06         | 0.7667   | 0.0197 | 0         | 0.1647         | 0.0726   |
| PerCP-Cy5-5-A  | 0      | 0.039   | 100           | 9.468    | 3.2592 | 2.1753    | 0.1714         | 0.0838   |
| PE-Cy7-A       | 0.4058 | 3.1773  | 8.9218        | 100      | 0.3647 | 7.7659    | 0.1756         | 0.1011   |
| APC-A          | 0      | 0       | 3.954         | 0.2887   | 100    | 10.5857   | 0.1736         | 0.0992   |
| APC-Cy7-A      | 4.2067 | 2.1406  | 2.1313        | 4.4673   | 9.5894 | 100       | 1.0006         | 0.5683   |
| Pacific Blue-A | 0.3743 | 0       | 0             | 0.0093   | 0.0334 | 0         | 100            | 30.8321  |
| AmCyan-A       | 1.7286 | 0.3481  | 0.1833        | 0.0218   | 0      | 0         | 15.5819        | 100      |

The compensation controls were OneComp ebeads™ compensation beads (ebioscience, 01-1111-42) for the antibodies and patient cells for the fixable live dead control. Each drop of beads contains two populations: a positive population and a negative population that will

not react with species selected antibodies. Compensation controls were set up and run for each patient experiment.
